# Supplementary material for: Whole-genome sequencing identifies recurrent mutations in hepatocellular carcinoma
Source: HighWire-hosted journal article supplement (doi:10.1101/gr.154492.113), 2013-06-20
Supplement: Supplemental_Information.docx [file Supplemental_Information.docx]

Supplementary Information

**Whole genome sequencing identifies recurrent mutations in hepatocellular carcinoma**

Zhengyan Kan1*, Hancheng Zheng2*, Xiao Liu2*,Shuyu Li3*, Thomas D. Barber3,Zhuolin Gong2, Huan Gao2, Ke Hao4, Melinda D. Willard3,Jiangchun Xu1, Robert Hauptschein1, Paul A. Rejto1, Julio Fernandez1, Guan Wang2, Qinghui Zhang2, Bo Wang2, Ronghua Chen4, Jian Wang3,Nikki P. Lee5, Wei Zhou4, Zhao Lin2, Zhiyu Peng2, Kang Yi2, Shengpei Chen2, Lin Li2, Xiaomei Fan2, Jie Yang2, Rui Ye2, Jia Ju2, Kai Wang1, Heather Estrella1, Shibing Deng1, Ping Wei1, Ming Qiu1, Isabella H. Wulur3, Jiangang Liu3, Mariam E. Ehsani3, Chunsheng Zhang4, Andrey Loboda4, Wing Kin Sung5,6, Amit Aggarwal3, Ronnie T. Poon5, Sheung Tat Fan5, Jun Wang2,7,8,James Hardwick4,9, Christoph Reinhard3, Hongyue Dai4, Yingrui Li2, John M. Luk5,10,11, and Mao Mao1,9

1Pfizer Oncology, San Diego, CA; 2BGI-Shenzhen, Shenzhen, China; 3Eli Lilly and Company, Indianapolis, IN; 4Merck Research Laboratories, Boston, MA; 5Department of Surgery, University of Hong Kong, Hong Kong, China.; 6School of Computing Science, National University of Singapore, Singapore; 7Department of Biology; 8The Novo Nordisk Foundation Center for Basic Metabolic Research, University of Copenhagen, Copenhagen, Denmark; 9Asian Cancer Research Group, Inc., Wilmington, DE; 10Departments of Pharmacology and Surgery, National University of Singapore, and 11Institute of Molecular and Cell Biology, A*STAR, Singapore.

*****These authors contributed equally to this work.

Correspondence should be addressed to Y.L. ([liyr@genomics.org.cn](mailto:liyr@genomics.org.cn)), J.L. ([jmluk@hku.hk](mailto:jmluk@hku.hk)) or M.M. ([mao.mao@pfizer.com](mailto:mao.mao@pfizer.com) )

**Supplementary Figure Legends**

**Supplementary Figure 1: Somatic mutation patterns in the HCC genome.** (a) The mutation prevalence across different genomic regions ranges from 2.3 to 4.0 substitutions per Mb, with higher prevalence in non-coding regions (introns, intergenic, repeats and pseudo-genes) than in protein-coding regions, UTRs, promoters and canonical splice sites. (b) Mutation prevalence across different mutation types. C:G substitutions have been divided into those at CpG dinucleotides and those not at CpG dinucleotides. The distribution of mutation is characterized by a high rate of G:C>A:T transitions at CpG and lower rates of A:T>C:G and G:C>C:G transversions. (c) Number of somatic substitutions across individual HCC tumours. Even though mutation prevalence is highly variable across samples, the pattern of mutation distribution is consistent across most of the samples.

**Supplementary Figure 2: TP53 mutations associated with chromosome instability and clinical variables.** (a)Chromosome instability **(**CIN) in TP53 wild-type and mutant HCC tumours. CIN score quantifies the extent of copy number changes in a cancer genome. It is calculated by where C is the copy number value of a copy number segment, L is the length of the segment and n is the number of copy number segments. (b) Tumour grade distribution in TP53 wild-type and mutant HCC tumours. (c) Kaplan-Meier survival plot for TP53 wild-type and mutant HCC patients.

**Supplementary Figure 3: Alignment of the mutations in kinase domains of JAK1, JAK2, JAK3 and ERBB2.** JAK1 mutations in tyrosine kinase domains aligned with known mutations in JAK2, JAK3 and ERBB2. Protein sequence alignment for Pfam domain PF07714 was used. Mutations in ‘JAK1_HUMAN’ were found in this study. Mutations in ‘JAK1_BAF3’ represent de novo mutations from a mouse BaF3 clone that have been experimentally characterized in terms of activation of downstream signalling and sensitivity to ATP-competitive JAK inhibitors (INCB018424)([Hornakova et al. 2011](#_ENREF_3)). Mutations in ‘JAK1_REVIEW’ represent point mutations discussed in a recent review focused on Janus kinases([Haan et al. 2010](#_ENREF_1)).

**Supplementary Figure 4: JAK inhibitors inhibit JAK1 S703I mutant-mediated activation of p-STAT3 in Ba/F3 cells.** Lysates of JAK1 (S703I)-transduced Ba/F3 cells treated with 1 uM compounds for 2-h in serum free media were subjected to immunoblot analysis for pSTAT3 (pY705) and STAT3.

**Supplementary Figure 5: Frequencies of copy number gains and losses for chromosomal arms.** Each chromosomal arm region in each tumors sample is classified as copy gain (≥3) or loss (≤1.25) if > 50% of the region consists of CNV segments.

**Supplementary Figure 6: Selective amplification and deletion of cancer genes.** Shown here are box plots comparing the gene-level G-scores of amplification (a) and deletion (b) for known oncogenes, tumour suppressors and other genes located in predicted CNV regions with those outside of CNV regions.

**Supplementary Figure 7: Overview of cancer pathways impacted by genomic alterations.** Somatic changes in HCC genomes, when mapped to KEGG overview of pathways in cancer (map09020)([Kanehisa et al. 2008](#_ENREF_4)), are shown to alter many pathways and cellular processes pertaining to known hallmarks of carcinogenesis including proliferation, blocking differentiation, resisting cell death, evading growth suppressors, tumour promoting inflammation, tissue invasion and metastasis, and DNA damage repair([Hanahan and Weinberg 2011](#_ENREF_2)). Genes are colour labelled based on genomic alteration statuses identified in this study.

**Supplementary Figure 8. Genomic alteration pattern of key genes and pathways across expression subclasses.** Each cell of the heatmap represents alteration status for a gene or pathway in a HCC sample. Genomic alterations are shown for four pathways (WNT, G1/S, JAK/STAT and Apoptosis), significantly mutated genes, putative driver genes in amplified and deleted regions, and genes frequently affected by HBV integrations.

**Supplementary Figure 9. Somatic SNV detection work flow.**

**Supplementary tables S1 to S13** – Please refer to individual worksheet in excel file

Table S1. List of 88 HCC patients and molecular data ID.

Table S2. Sequenom validation results for WGS predicted somatic SNVs.

Table S3. List of all protein-altering somatic SNVs identified in the cohort.

Table S4. List of genes with protein-altering somatic mutations and significance scores.

Table S5. List of protein-altering somatic small indels identified in the cohort.

Table S6. Sequenom validation results for WGS predicted somatic indels.

Table S7. List of significant CNV regions in the cohort.

Table S8. List of genes affected by significant CNV regions in the cohort.

Table S9. Frequently altered canonical cancer pathways.

Table S10. Significant pathways identified by pathway enrichment analysis.

Table S11. HCC molecular classification and association with different genetic alterations.

Table S12. Significant gene ontology terms associated with HCC subclasses based on gene expression analysis.

Table S13. Inhibition of cell proliferation in PD173074 treated HCC cell lines.**Reference**

Haan C, Behrmann I, Haan S. 2010. Perspectives for the use of structural information and chemical genetics to develop inhibitors of Janus kinases. *J Cell Mol Med* **14**(3): 504-527.

Hanahan D, Weinberg RA. 2011. Hallmarks of cancer: the next generation. *Cell* **144**(5): 646-674.

Hornakova T, Springuel L, Devreux J, Dusa A, Constantinescu SN, Knoops L, Renauld JC. 2011. Oncogenic JAK1 and JAK2-activating mutations resistant to ATP-competitive inhibitors. *Haematologica* **96**(6): 845-853.

Kanehisa M, Araki M, Goto S, Hattori M, Hirakawa M, Itoh M, Katayama T, Kawashima S, Okuda S, Tokimatsu T et al. 2008. KEGG for linking genomes to life and the environment. *Nucleic Acids Res* **36**(Database issue): D480-484.
